# Supplementary material
Source: Research Square preprint supplement (doi:10.21203/rs.3.rs-9402768/v1)
Supplement: Supplementary file 1 [file 4471038d2c769badbfc6e2ce.xlsx]

## Sheet: S1
Supplementary Table S1: Overview of strains investigated in this study. I, susceptible, increased exposure; R, resistant; S, susceptible LV, locus variant; ND, not determined; ST, sequence type.
Strain ID	ST	Species	Carbapenemase gene	Phenotypic antimicrobial susceptibility testing
				AZI	CDR	CLO	CIP	GEN	MEC	NAL	NIT	PTZ	TET	TGC	TRI	TSU	MER	FDC
G24-001C2	ST37	Klebsiella pneumoniae	blaNDM-5	S	R	S	I	S	S	R	S	R	S	S	S	S	R	S
G24-004C2	ST395	Klebsiella pneumoniae	blaNDM-5 (2x)	S	R	R	R	R	R	R	R	R	R	S	R	R	R	R
G24-005C2	ST512	Klebsiella pneumoniae	blaKPC-3	R	R	R	R	R	R	R	R	R	R	S	S	S	R	S
G24-005C4	ST147	Klebsiella pneumoniae	blaOXA-48	S	R	R	R	R	S	R	R	R	R	S	S	S	R	S
G24-006C2	ST307	Klebsiella pneumoniae	blaNDM-5	S	R	R	R	S	S	R	S	R	S	S	R	R	R	S
G24-007C2	ST111	Klebsiella pneumoniae	blaNDM-5	S	R	S	S	R	S	S	S	R	S	S	S	S	R	R
G24-008C	ST395	Klebsiella pneumoniae	blaNDM-5	S	R	S	R	S	S	R	R	R	S	S	S	S	R	R
G24-009C2	ST3712	Klebsiella pneumoniae	blaOXA-181	S	S	S	R	S	S	R	S	R	S	S	S	S	R	S
G24-009C3	ST6547	Klebsiella pneumoniae		R	R	S	I	S	S	S	R	R	S	S	R	R	S	R
G24-011C2	ST476	Klebsiella grimontii	blaOXA-181	S	S	S	R	S	S	R	S	R	S	S	S	S	R	ND
G24-013C1	ST307	Klebsiella pneumoniae	blaNDM-5	S	R	R	R	R	S	R	R	R	R	S	R	R	R	S
G24-016C2	ST308	Klebsiella pneumoniae		R	S	R	I	S	S	R	S	R	R	S	S	S	S	S
G24-019C4	ST15	Klebsiella pneumoniae	blaNDM-5	S	R	R	R	R	R	R	S	R	S	S	R	R	R	S
G24-023C2	ST662	Klebsiella oxytoca	blaNDM-5	S	R	S	S	S	S	S	S	R	S	S	S	S	R	ND
G24-024C2	ST395	Klebsiella pneumoniae	blaNDM-5 (2x)	S	R	R	R	R	R	R	R	R	R	S	R	R	R	R
G24-025C2	ST88	Klebsiella michiganensis	blaNDM-5	S	R	S	I	R	S	S	S	R	S	S	R	R	R	ND
G24-025C3	ST307	Klebsiella pneumoniae	blaNDM-5	S	R	R	R	R	S	R	R	R	R	S	R	R	R	S
G24-027C2	ST8254	Klebsiella variicola subsp. variicola	blaNDM-5	S	R	S	S	S	S	S	S	R	S	S	S	S	R	S
G24-029C1	ST39	Klebsiella pneumoniae	blaNDM-5	R	R	S	I	S	S	S	S	R	S	S	S	S	R	R
G24-030C1	ST307	Klebsiella pneumoniae	blaNDM-5	S	R	R	R	R	S	R	R	R	R	S	R	R	R	S
G24-031C2	ST395	Klebsiella pneumoniae	blaNDM-5	S	R	S	R	S	S	R	R	R	S	S	S	S	R	S
G24-031C3	ST395	Klebsiella pneumoniae	blaNDM-5	S	R	R	R	R	R	R	R	R	R	S	R	R	R	R
G24-033C2	ST1805	Klebsiella pneumoniae	blaNDM-5	S	R	S	S	S	S	S	S	R	R	S	S	S	R	S
G24-035C1	ST37	Klebsiella pneumoniae	blaNDM-5	S	R	S	S	R	S	S	S	R	S	S	R	R	R	S
G24-036C2	ST307	Klebsiella pneumoniae	blaNDM-5	S	R	R	R	R	S	R	S	R	R	S	R	R	R	S
G24-037C3	ST395	Klebsiella pneumoniae	blaNDM-5	S	R	S	R	S	S	R	R	R	S	S	S	S	R	S
G24-038C	ST307	Klebsiella pneumoniae	blaNDM-5	S	R	R	R	R	S	R	S	R	R	S	R	R	R	S
G24-043C	ST147	Klebsiella pneumoniae	blaOXA-48	S	S	R	R	R	S	R	R	R	S	S	S	S	R	S
G24-044C2	ST180	Klebsiella michiganensis	blaNDM-5	S	R	S	S	S	S	S	S	R	S	S	S	S	R	ND
G24-044C4	ST395	Klebsiella pneumoniae	blaNDM-5	S	R	S	R	S	S	R	R	R	S	S	S	S	R	R
G24-045C1	ST37	Klebsiella pneumoniae	blaNDM-5	S	R	S	S	R	S	S	S	R	S	S	R	R	R	S
G24-046C	ST395	Klebsiella pneumoniae	blaNDM-5	S	R	S	R	S	S	R	R	R	S	S	S	S	R	R
G24-047C1	ST147-1LV	Klebsiella aerogenes	blaNDM-5	S	R	S	S	S	S	S	S	R	S	S	S	S	R	ND
G24-047C2	ST36	Klebsiella pneumoniae	blaNDM-5	S	R	R	I	R	S	S	S	R	R	S	R	R	R	S
G24-053C2	ST1905	Klebsiella pneumoniae	blaNDM-5	S	R	S	S	S	S	S	S	R	S	S	S	S	R	S
G24-055C2	ST37	Klebsiella pneumoniae	blaNDM-5	S	R	S	S	R	S	S	S	R	S	S	R	R	R	S
G24-056C2	ST307	Klebsiella pneumoniae	blaNDM-5	S	R	R	R	S	S	R	S	R	R	S	R	R	R	S
G24-057C2	ST395	Klebsiella pneumoniae	blaNDM-5	S	R	S	R	S	S	R	R	R	S	S	S	S	R	R
G24-058C2	ST1339-1LV	Klebsiella variicola subsp. variicola	blaNDM-5	S	R	S	S	S	S	S	S	R	S	S	S	S	S	S
G24-060C	ST307	Klebsiella pneumoniae	blaNDM-5	S	R	R	R	R	S	R	S	R	R	S	R	R	R	S
